# Supplementary material
Source: PubMed Central journal article supplement (PMC3557045)
Supplement: 1216595110_pnas.201216595SI.pdf [file 1216595110_pnas.201216595SI.pdf]

# Supporting Information

Dunlap et al. 10.1073/pnas.1216595110

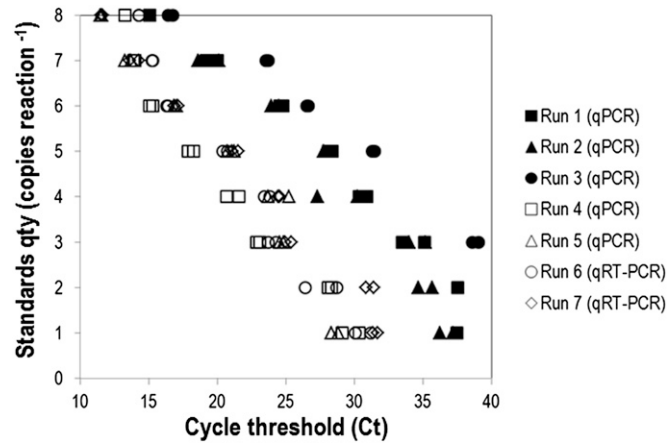

Fig. S1. Standard quantity compared with cycle threshold of quantitative PCR and quantitative RT-PCR analyses of LaCopCV prevalence, viral load, and transcription. Regression statistics are provided in Table S1.

**Table S1. Linear regression statistics for quantitative PCR (qPCR) and quantitative RT-PCR (qRT-PCR) runs examining LaCopCV prevalence, viral load, and transcription**

| Run no. | Objective | $R^2$ | $m$   | $b$  |
|---------|-----------|-------|-------|------|
| 1       | qPCR      | 0.97  | -0.28 | 12.6 |
| 2       | qPCR      | 0.94  | -0.32 | 13.5 |
| 3       | qPCR      | 0.98  | -0.23 | 12.1 |
| 4       | qPCR      | 0.96  | -0.38 | 12.2 |
| 5       | qPCR      | 0.96  | -0.37 | 12.3 |
| 6       | qRT-PCR   | 0.97  | -0.40 | 13.1 |
| 7       | qRT-PCR   | 0.98  | -0.32 | 11.6 |

Regression fit with the model  $y = mx + b$ , where  $m$  is the slope and  $b$  is the intercept.
